# Supplementary material
Source: Research Square preprint supplement (doi:10.21203/rs.3.rs-9340613/v1)
Supplement: Supplementary file 2 [file b485618c021ac3c21ec5cd92.docx]

**Supplementary Table 1.** Comparison of 7-day home blood pressure measurement parameters between follicular, mid luteal and late luteal phases in PMS (+) group

| **Parameters** | **PMS (+) Group** | | |  |  |  |  |
| --- | --- | --- | --- | --- | --- | --- | --- |
| **Follicular phase (n: 18)** | **Early Luteal phase (n: 18)** | **Late Luteal phase (n: 18)** | **p value** | **F vs. EL** | **F vs. LL** | **EL vs. LL** |
| SBP (mm Hg) |  |  |  |  |  |  |  |
| Morning | 97.69 ± 7.63 | 99.73 ± 7.10 | 101.07 ± 7.97 | **0.012** | -2.04 ± 1.08  (p=0.229) | -3.38 ± 1.13  (**p=0.024)** | -1.34 ± 0.99  (p=0.589 |
| Evening | 98.35 ± 7.85 | 101.54 ± 9.16 | 101.40 ± 7.21 | **0.010** | -3.19 ± 0.98  (p**=0.014**) | -3.045 ± 1.04  **(p=0.029)** | 0.148 ± 0.76  (p= >0.999) |
| Average | 97.55 ± 7.60 | 100.64 ± 7.75 | 101.23± 6.88 | 0.102 | -3.08 ± 2.05  (p=0.454) | -3.67 ± 1.88  (p=0.203) | -0.597 ± 0.62  (p= >0.999) |
| DBP (mm Hg) |  |  |  |  |  |  |  |
| Morning | 65.10 ± 5.57 | 64.82 ± 5.44 | 66.32 ± 5.89 | 0.170 | 0.28 ± 0.94  (p= >0.999) | -1.21 ± 0.89  (p=0.577) | -1.49 ± 0.46  (p=**0.015)** |
| Evening | 64.22 ± 5.84 | 65.29 ± 6.13 | 65.10 ± 5.59 | 0.472 | -1.06 ± 1.02  (p=0.938) | -0.88 ± 0.96  (p= >0.999) | -1.12 ± 1.10  (p=0.975) |
| Average | 64.14 ± 6.13 | 65.05 ± 5.44 | 65.71 ± 5.36 | 0.421 | -0.91 ± 1.50  (p= >0.999) | -1.57 ± 1.66  (p= >0.999) | -0.65 ± 0.42  (p=0.435) |
| MAP (mm Hg) |  |  |  |  |  |  |  |
| Morning | 75.96 ± 6.04 | 76.46 ± 5.56 | 77.90 ± 6.26 | 0.061 | -0.49 ± 0.93  (p= >0.999) | -1.93 ± 0.90  (p=0.138) | -1.44 ± 0.56  (p=0.063) |
| Evening | 75.60 ± 6.27 | 77.37 ± 6.57 | 77.20 ± 5.67 | 0.067 | -1.77 ± 0.88  (p=0.180) | -1.60 ± 0.87  (p=0.250) | 0.17 ± 0.65  (p= >0.999) |
| Average | 75.28 ± 6.37 | 76.91 ± 5.74 | 77.55 ± 5.52 | 0.236 | -1.63 ± 1.59  (p=0.955) | -2.27 ± 1.65  (p=0.563) | -0.63 ± 0.39  (p=0.364) |
| Heart rate ( /min.) |  |  |  |  |  |  |  |
| Morning | 82.50 ± 9.32 | 84.48 ± 11.08 | 83.38 ± 10.57 | 0.406 | -1.97 ± 1.51  (p=0.627) | -0.88 ± 1.61  (p= >0.999) | 1.09 ± 1.20  (p= >0.999) |
| Evening | 80.32 ± 9.74 | 82.21 ± 11.52 | 80.24 ± 11.84 | 0.381 | -1.89 ± 1.91  (p= >0.999) | 0.08 ± 1.80  (p= >0.999) | 1.97 ± 1.06  (p=0.241) |
| Average | 79.90 ± 7.78 | 83.34 ± 10.36 | 81.81 ± 10.86 | 0.311 | -3.43 ± 2.57  (p=0.600) | -1.90 ± 2.87  (p= >0.999) | 1.53 ± 0.91  (p=0.338) |

Results are presented as mean ± standard deviation. The table shows follicular, early luteal, and late luteal values, as well as comparisons in pairs, and p-values are provided.

DBP: diastolic blood pressure, MAP: mean arterial pressure; PMS: premenstrual syndrome; SBP: systolic blood pressure; F:Follicular; EL: Early Luteal; LL: Late Luteal.

**Supplementary Table 2.** Comparison of 7-day home blood pressure measurement parameters between follicular, early luteal and late luteal phases in PMS (-) group

| **Parameters** | **PMS (-) Group** | | |  |  |  |  |
| --- | --- | --- | --- | --- | --- | --- | --- |
| **Follicular phase (n: 15)** | **Early Luteal phase (n: 15)** | **Late Luteal phase (n: 15)** | **p value** | **F vs. EL** | **F vs. LL** | **EL vs. LL** |
| SBP (mm Hg) |  |  |  |  |  |  |  |
| Morning | 98.56 ± 6.64 | 99.56 ± 6.15 | 99.72 ±5.89 | 0.441 | -1.009 ± 0,73  (p=0.578) | -1.164 ± 1.10  (p=0.923) | -0.156 ± 1.04  (p=>0.999) |
| Evening | 98.62 ± 7.06 | 99.31 ± 6.70 | 99.77 ± 7.24 | 0.225 | -0.690 ± 0.99  (p= >0.999) | -1.152 ± 0.90  (p=0.674) | -0.462 ± 0.71  (p= >0.999) |
| Average | 99.75 ± 6.18 | 99.44 ± 5.91 | 99.75± 6.07 | 0.857 | -0.291 ± 2.22  (p= >0.999) | -0.600 ± 2.27  (p=>0.999) | -0.309 ± 0.71  (p= >0.999) |
| DBP (mm Hg) |  |  |  |  |  |  |  |
| Morning | 66.45 ± 7.33 | 69.29 ± 9.19 | 67.70 ±7.20 | 0.110 | -2.84 ± 1.34  (p=0.161) | -1.25 ± 1.08  (p=0.789) | 1.58 ± 1.44  (p=0.876) |
| Evening | 65.33 ± 7.67 | 65.42 ± 8.01 | 66.54 ± 9.08 | 0.413 | -0.08 ± 0.77  (p=1.000) | -1.21 ± 1.09  (p=0.860) | -1.12 ± 1.10  (p=.0.975) |
| Average | 66.52 ± 6.59 | 67.35 ± 8.42 | 67.12 ± 7.74 | 0.792 | -0.83 ± 1.86  (p= >0.999) | -0.60 ± 1.95  (p= >0.999) | 0.23 ± 0.93  (p= >0.999) |
| MAP (mm Hg) |  |  |  |  |  |  |  |
| Morning | 77.15 ± 6.71 | 79.38 ± 7.55 | 78.37 ± 6.12 | 0.118 | -2.23 ± 0.95  (p=0.107) | -1.22 ± 0.95  (p=0.667) | 1. ± 1.18   (p= >0.999) |
| Evening | 76.43 ± 7.06 | 76.72 ± 6.82 | 77.62 ± 7.89 | 0.344 | -0.28 ± 0.71  (p=>0.999) | -1.19 ± 0.91  (p=0.635) | -0.90 ± 0.86  (p=0.939) |
| Average | 77.39 ± 6.10 | 78.05 ± 7.01 | 78.00 ± 6.56 | 0.802 | -0.65 ± 1.78  (p= >0.999) | -0.60 ± 1.83  (p= >0.999) | 0.05 ± 0.77  (p= >0.999) |
| Heart rate ( /min.) |  |  |  |  |  |  |  |
| Morning | 83.51 ± 8.90 | 83.52 ± 8.00 | 83.84 ± 7.68 | 0.972 | -0.00 ± 1.91  (p= >0.999) | -0.32 ± 1.30  (p= >0.999) | -0.32 ± 1.43  (p= >0.999) |
| Evening | 79.77 ± 6.04 | 81.43 ± 9.09 | 80.84 ± 6.43 | 0.389 | -1.66 ± 1.26  (p=0.627) | -1.06 ± 0.82  (p=0.645) | 0.59 ± 1.57  (p= >0.999) |
| Average | 83.44 ± 8.30 | 82.47 ± 7.88 | 82.34 ± 6.71 | 0.807 | 0.97 ± 3.52  (p= >0.999) | 1.10 ± 2.93  (p= >0.999) | 0.13 ± 1.35  (p= >0.999) |

Results are presented as mean ± standard deviation. The table shows follicular, early luteal, and late luteal values, as well as comparisons in pairs, and p-values are provided.

DBP: diastolic blood pressure, MAP: mean arterial pressure; PMS: premenstrual syndrome; SBP: systolic blood pressure. F:Follicular; EL: Early Luteal; LL: Late Luteal.

**Supplementary Table 3.** Detailedcomparison of 24-hour ambulatory blood pressure monitoring (ABPM) parameters between PMS and non-PMS groups at follicular and luteal phases

| **Parameters** | **Follicular phase** | | |  | **Luteal phase** | | |
| --- | --- | --- | --- | --- | --- | --- | --- |
| **PMS (+)**  **(n: 31)** | **PMS (-)**  **(n: 21)** | **p-value** |  | **PMS (+)**  **(n: 18)** | **PMS (-)**  **(n: 15)** | **p-value** |
| **24-hour** |  |  |  |  |  |  |  |
| Systolic |  |  |  |  |  |  |  |
| Mean (mm Hg) | 106.89±7.23 | 106.93±7.36 | 0.986 |  | 107.00±6.04 | 105.93±4.93 | 0.581 |
| SDS | -1.03±1.07 | -0.94±1.05 | 0.804 |  | -1.02±0.91 | -1.09±0.72 | 0.832 |
| Load (%) | 7.26±9.67 | 4.42±5.38 | 0.293 |  | 9.07±13.01 | 4.48±4.41 | 0.202 |
| Variability (%) | 12.16±3.49 | 10.96±2.21 | 0.233 |  | 12.13±2.70 | 11.58±1.99 | 0.512 |
| Dipping (%) | 14.24±7.11 | 12.52±6.60 | 0.471 |  | 12.97±5.50 | 13.25±4.33 | 0.872 |
| Non-dipper, n (%) | 5 (16.1) | 6 (28.6) | 0.917 |  | 4 (22.2) | 4 (26.7) | 0.777 |
| >95th pct., n (%) | 0 (0) | 0 (0) | - |  | 0 (0) | 0 (0) | - |
| Diastolic |  |  |  |  |  |  |  |
| Mean (mm Hg) | 70.10±5.97 | 68.21±8.05 | 0.455 |  | 67.94±5.19 | 68.53±7.13 | 0.792 |
| SDS | 0.46±1.10 | 0.17±1.38 | 0.527 |  | 0.06±0.95 | 0.22±1.24 | 0.691 |
| Load (%) | 22.04±19.29 | 20.98±21.46 | 0.885 |  | 20.85±22.16 | 21.38±20.25 | 0.944 |
| Variability (%) | 10.44±2.47 | 10.06±2.09 | 0.630 |  | 10.35±2.29 | 10.03±1.84 | 0.660 |
| Dipping (%) | 20.22±7.64 | 18.53±8.18 | 0.543 |  | 17.34±6.20 | 19.49±6.43 | 0.340 |
| Non-dipper, n (%) | 2 (6.5) | 4 (19.0) | 0.233 |  | 2 (11.1) | 2 (13.3) | 0.851 |
| >95th pct., n (%) | 3 (9.7) | 4 (19.0) | 0.463 |  | 1 (5.6) | 2 (13.3) | 0.472 |
| MAP |  |  |  |  |  |  |  |
| Mean (mm Hg) | 81.57±6.26 | 81.43±6.03 | 0.946 |  | 80.44±5.03 | 81.46±4.85 | 0.558 |
| SDS | -0.07±1.04 | -0.06±0.92 | 0.971 |  | -0.28±0.81 | -0.08±0.73 | 0.453 |
| Variability (%) | 10.12±2.71 | 9.18±2.02 | 0.260 |  | 10.03±2.33 | 9.62±1.99 | 0.595 |
| Dipping (%) | 16.31±7.31 | 14.46±6.57 | 0.445 |  | 13.98±5.74 | 15.21±5.49 | 0.537 |
| Non-dipper, n (%) | 3 (9.7) | 3 (14.3) | 0.761 |  | 6 (33.3) | 2 (13.3) | 0.193 |
| >95th pct., n (%) | 2 (6.5) | 0 (0) | 0.207 |  | 0(0) | 0(0) | - |
| Pulse pressure |  |  |  |  |  |  |  |
| Mean (mm Hg) | 36.68±3.90 | 38.45±7.73 | 0.428 |  | 39.00±4.94 | 37.33±6.24 | 0.410 |
| Variability (%) | 6.69±0.92 | 6.60±1.53 | 0.841 |  | 6.65±0.92 | 6.87±1.60 | 0.643 |
| Heart rate |  |  |  |  |  |  |  |
| Mean (/min.) | 82.05±9.38 | 81.78±10.24 | 0.938 |  | 84.94±9.41 | 84.33±10.27 | 0.861 |
| SDS | 0.27±1.06 | 0.14±1.15 | 0.740 |  | 0.61±1.00 | 0.43±1.21 | 0.657 |
| Variability (%) | 13.39±2.82 | 13.48±3.28 | 0.940 |  | 12.96±3.73 | 14.63±4.02 | 0.230 |
| **Daytime (awake)** |  |  |  |  |  |  |  |
| Systolic |  |  |  |  |  |  |  |
| Mean (mm Hg) | 111.68±7.88 | 110.77±7.66 | 0.736 |  | 111.22±6.80 | 110.26±5.13 | 0.649 |
| SDS | -0.95±1.08 | -0.98±0.98 | 0.940 |  | -1.02±0.93 | -1.05±0.69 | 0.919 |
| Load (%) | 7.06±8.66 | 4.53±5.42 | 0.312 |  | 10.75±17.28 | 5.36±6.64 | 0.265 |
| Variability (%) | 9.97±2.07 | 9.02±2.38 | 0.234 |  | 10.47±2.71 | 9.71±2.37 | 0.393 |
| >95th pct., n (%) | 0 (0) | 0 (0) | - |  | 0 (0) | 0 (0) | - |
| Diastolic |  |  |  |  |  |  |  |
| Mean (mm Hg) | 74.57±6.54 | 72.02±8.89 | 0.341 |  | 71.61±6.16 | 72.86±7.80 | 0.618 |
| SDS | 0.20±1.08 | -0.04±1.42 | 0.588 |  | -0.23±1.05 | 0.07±1.30 | 0.461 |
| Load (%) | 21.74±21.61 | 20.95±22.06 | 0.919 |  | 20.73±29.08 | 22.86±22.40 | 0.814 |
| Variability (%) | 7.89±1.63 | 7.95±1.66 | 0.926 |  | 8.79±2.43 | 7.64±1.61 | 0.114 |
| >95th pct., n (%) | 4 (12.9) | 2 (9.5) | 0.564 |  | 0 (0) | 2 (13.3) | 0.117 |
| MAP |  |  |  |  |  |  |  |
| Mean (mm Hg) | 85.68±6.90 | 84.93±6.53 | 0.749 |  | 83.66±5.72 | 85.40±5.09 | 0.365 |
| SDS | -0.14±1.04 | -0.22±0.88 | 0.797 |  | -0.45±0.82 | -0.18±0.70 | 0.310 |
| Variability (%) | 7.97±1.65 | 7.45±1.58 | 0.364 |  | 8.67±2.51 | 7.60±2.26 | 0.208 |
| >95th pct., n (%) | 1 (3.2) | 0 (0) | 0.331 |  | 0 (0) | 0 (0) | - |
| Pulse pressure |  |  |  |  |  |  |  |
| Mean (mm Hg) | 37.05±4.33 | 38.68±8.09 | 0.489 |  | 39.83±5.22 | 37.26±6.48 | 0.228 |
| Variability (%) | 6.76±0.99 | 6.58±1.36 | 0.675 |  | 6.79±1.06 | 7.15±1.69 | 0.481 |
| Heart rate |  |  |  |  |  |  |  |
| Mean (/min.) | 86.89±9.40 | 86.36±10.97 | 0.884 |  | 89.05±9.83 | 89.66±11.70 | 0.874 |
| SDS | 0.23±0.96 | 0.07±1.68 | 0.680 |  | 0.45±0.95 | 0.40±1.22 | 0.895 |
| Variability (%) | 11.66±2.54 | 10.99±2.54 | 0.457 |  | 11.48±4.12 | 12.21±3.24 | 0.569 |
| **Night-time (sleep)** |  |  |  |  |  |  |  |
| Systolic |  |  |  |  |  |  |  |
| Mean (mm Hg) | 95.57±8.61 | 96.77±8.48 | 0.689 |  | 95.57±8.61 | 96.77±8.48 | 0.689 |
| SDS | -0.94±1.25 | -0.71±1.21 | 0.591 |  | -0.81±0.90 | -0.86±0.79 | 0.862 |
| Load (%) | 7.33±18.59 | 2.95±8.53 | 0.373 |  | 7.33±18.59 | 2.95±8.53 | 0.373 |
| Variability (%) | 7.47±1.58 | 6.86±1.25 | 0.219 |  | 7.47±1.58 | 6.86±1.25 | 0.219 |
| >95th pct., n (%) | 1 (3.2) | 0 (0) | 0.331 |  | 0 (0) | 0 (0) | - |
| Diastolic |  |  |  |  |  |  |  |
| Mean (mm Hg) | 59.36±6.66 | 58.34±6.98 | 0.667 |  | 59.36±6.66 | 58.34±6.98 | 0.667 |
| SDS | 0.65±1.07 | 0.54±1.05 | 0.757 |  | 0.62±0.93 | 0.58±1.15 | 0.912 |
| Load (%) | 22.87±26.04 | 19.30±27.05 | 0.706 |  | 22.87±26.04 | 19.30±27.05 | 0.706 |
| Variability (%) | 6.79±2.01 | 6.57±1.17 | 0.711 |  | 6.79±2.01 | 6.57±1.17 | 0.711 |
| >95th pct., n (%) | 3 (9.7) | 2 (9.5) | 0.846 |  | 3 (16.7) | 3 (20.0) | 0.813 |
| MAP |  |  |  |  |  |  |  |
| Mean (mm Hg) | 71.52±6.90 | 72.46±5.83 | 0.671 |  | 71.52±6.90 | 72.46±5.83 | 0.671 |
| SDS | 0.09±1.16 | 0.26±0.95 | 0.633 |  | 0.11±0.84 | 0.24±0.79 | 0.654 |
| Variability (%) | 6.36±1.73 | 5.79±1.30 | 0.285 |  | 6.36±1.73 | 5.79±1.30 | 0.285 |
| >95th pct., n (%) | 2 (6.5) | 1 (4.7) | 0.697 |  | 1 (5.6) | 0 (0) | 0.055 |
| Pulse pressure |  |  |  |  |  |  |  |
| Mean (mm Hg) | 36.36±4.41 | 38.42±7.67 | 0.332 |  | 36.36±4.41 | 38.42±7.67 | 0.332 |
| Variability (%) | 5.74±1.32 | 5.70±1.82 | 0.937 |  | 5.74±1.32 | 5.70±1.82 | 0.431 |
| Heart rate |  |  |  |  |  |  |  |
| Mean (/min.) | 69.78±9.60 | 68.59±8.64 | 0.705 |  | 69.78±9.60 | 68.59±8.64 | 0.705 |
| SDS | 0.26±0.97 | 0.07±0.77 | 0.539 |  | 0.76±0.94 | 0.35±1.08 | 0.254 |
| Variability (%) | 7.00±3.33 | 9.07±4.87 | 0.172 |  | 7.00±3.33 | 9.07±4.87 | 0.172 |

Results are presented as mean ± standard deviation

PMS: premenstrual syndrome; SDS: standard deviation score, MAP: mean arterial pressure

**Supplementary Table 4.** Detailedcomparison of 24-hour ambulatory blood pressure monitoring (ABPM) parameters between follicular and luteal phases according to PMS group

| **Parameters** | **PMS (+) Group** | | |  | **PMS (-) Group** | | |
| --- | --- | --- | --- | --- | --- | --- | --- |
| **Follicular phase**  **(n: 18)** | **Luteal phase**  **(n: 18)** | **p-value** |  | **Follicular phase**  **(n: 15)** | **Luteal phase**  **(n: 15)** | **p-value** |
| **24-hour** |  |  |  |  |  |  |  |
| Systolic |  |  |  |  |  |  |  |
| Mean (mm Hg) | 107.11±7.37 | 107.00±6.04 | 0.921 |  | 106.93±7.36 | 105.93±4.93 | 0.345 |
| SDS | -1.00±1.10 | -1.02±0.91 | 0.900 |  | -0.94±1.05 | -1.09±0.72 | 0.341 |
| Load (%) | 7.66±9.78 | 9.07±13.01 | 0.548 |  | 4.42±5.38 | 3.76±3.57 | 0.588 |
| Variability (%) | 12.18±3.59 | 12.13±2.70 | 0.960 |  | 10.9614±2.21 | 11.58±1.99 | 0.420 |
| Dipping (%) | 14.41±7.28 | 12.97±5.50 | 0.465 |  | 12.52±6.60 | 13.25±4.33 | 0.708 |
| Non-dipper. n (%) | 6 (33.3) | 4 (22.2) | 0.430 |  | 5 (33.3) | 4 (26.7) | 0.719 |
| >95th pct. n (%) | 0(0) | 0(0) | - |  | 0(0) | 0(0) | - |
| Diastolic |  |  |  |  |  |  |  |
| Mean (mm Hg) | 70.44±5.95 | 67.94±5.19 | **0.029** |  | 68.21±8.05 | 68.53±7.13 | 0.720 |
| SDS | 0.52±1.09 | 0.06±0.95 | **0.029** |  | 0.17±1.38 | 0.22±1.24 | 0.766 |
| Load (%) | 22.71±19.62 | 20.85±22.16 | 0.716 |  | 20.98±21.46 | 20.83±20.91 | 0.946 |
| Variability (%) | 10.47±2.54 | 10.35±2.29 | 0.864 |  | 10.06±2.09 | 10.03±1.84 | 0.952 |
| Dipping (%) | 20.44±7.79 | 17.34±6.20 | 0.102 |  | 18.53±8.18 | 19.49±6.43 | 0.693 |
| Non-dipper. n (%) | 2 (11.1) | 2 (11.1) | 1.000 |  | 4 (26.7) | 2 (13.3) | 0.334 |
| >95th pct. n (%) | 3 (16.7) | 1 (5.6) | 0.331 |  | 4 (26.7) | 2 (13.3) | 0.164 |
| MAP |  |  |  |  |  |  |  |
| Mean (mm Hg) | 81.83±6.34 | 80.44±5.03 | 0.162 |  | 81.43±6.03 | 81.46±4.85 | 0.962 |
| SDS | -0.03±1.05 | -0.28±0.81 | 0.125 |  | -0.06±0.92 | -0.08±0.73 | 0.848 |
| Load (%) | - | - | - |  | - | - | - |
| Variability (%) | 10.13±2.79 | 10.03±2.33 | 0.896 |  | 9.18±2.02 | 9.62±1.99 | 0.451 |
| Dipping (%) | 16.52±7.46 | 13.98±5.74 | 0.180 |  | 14.46±6.57 | 15.21±5.49 | 0.694 |
| Non-dipper. n (%) | 3 (16.7) | 6 (33.3) | 0.187 |  | 3 (20.0) | 2 (13.3) | 0.582 |
| >95th pct. n (%) | 2 (11.1) | 0 (0) | 0.163 |  | 0(0) | 0(0) | - |
| Pulse pressure |  |  |  |  |  |  |  |
| Mean (mm Hg) | 36.55±3.97 | 39.00±4.94 | **0.018** |  | 38.45±7.73 | 37.33±6.24 | 0.384 |
| Variability (%) | 6.71±0.94 | 6.65±0.92 | 0.853 |  | 6.60±1.53 | 6.87±1.60 | 0.477 |
| Heart rate |  |  |  |  |  |  |  |
| Mean (/min.) | 82.61±9.33 | 84.94±9.41 | 0.078 |  | 81.78±10.24 | 84.33±10.27 | 0.086 |
| SDS | 0.34±1.05 | 0.61±1.00 | 0.064 |  | 0.14±1.15 | 0.43±1.21 | 0.093 |
| Dipping (%) | 20.23±7.84 | 16.11±7.73 | 0.058 |  | 20.13±8.01 | 19.93±8.53 | 0.931 |
| Non-dipper. n (%) | 2 (11.1) | 3 (16.7) | 0.163 |  | 1 (6.7) | 1 (6.7) | 1.000 |
| Variability (%) | 13.48±2.87 | 12.96±3.73 | 0.506 |  | 13.48±3.28 | 14.63±4.02 | 0.176 |
| **Daytime (awake)** |  |  |  |  |  |  |  |
| Systolic |  |  |  |  |  |  |  |
| Mean (mm Hg) | 111.94±8.03 | 111.22±6.80 | 0.625 |  | 110.77±7.66 | 110.26±5.13 | 0.724 |
| SDS | -0.92±1.10 | -1.02±0.93 | 0.596 |  | -0.98±0.98 | -1.05±0.69 | 0.694 |
| Load (%) | 7.45±8.74 | 10.75±17.28 | 0.288 |  | 4.53±5.42 | 4.25±5.26 | 0.886 |
| Variability (%) | 9.90±2.11 | 10.47±2.71 | 0.388 |  | 9.02±2.38 | 9.71±2.37 | 0.416 |
| >95th pct. n (%) | 0 (0) | 0 (0) | - |  | 0 (0) | 0 (0) | - |
| Diastolic |  |  |  |  |  |  |  |
| Mean (mm Hg) | 74.94±6.53 | 71.61±6.16 | **0.019** |  | 72.02±8.89 | 72.86±7.80 | 0.402 |
| SDS | 0.34±1.19 | -0.23±1.05 | **0.021** |  | -0.04±1.42 | 0.07±1.30 | 0.491 |
| Load (%) | 22.52±21.96 | 20.73±29.08 | 0.791 |  | 20.95±22.06 | 21.50±22.60 | 0.868 |
| Variability (%) | 7.81±1.64 | 8.79±2.43 | 0.092 |  | 7.95±1.66 | 7.64±1.61 | 0.579 |
| >95th pct. n (%) | 3 (16.7) | 0 (0) | **0.042** |  | 2 (13.3) | 2 (13.3) | 1.000 |
| MAP |  |  |  |  |  |  |  |
| Mean (mm Hg) | 86.00±6.96 | 83.66±5.72 | 0.067 |  | 84.93±6.53 | 85.40±5.09 | 0.592 |
| SDS | -0.09±1.05 | -0.45±0.82 | 0.053 |  | -0.22±0.88 | -0.18±0.70 | 0.726 |
| Load (%) | - | - | - |  | - | - | - |
| Variability (%) | 7.90±1.67 | 8.67±2.51 | 0.166 |  | 7.45±1.58 | 7.60±2.26 | 0.800 |
| >95th pct. n (%) | 1 (5.6) | 0 (0) | 0.331 |  | 0 (0) | 0 (0) | - |
| Pulse pressure |  |  |  |  |  |  |  |
| Mean (mm Hg) | 36.94±4.43 | 39.83±5.22 | **0.008** |  | 38.68±8.09 | 37.26±6.48 | 0.316 |
| Variability (%) | 6.74±1.02 | 6.79±1.06 | 0.850 |  | 6.58±1.36 | 7.15±1.69 | 0.155 |
| Heart rate |  |  |  |  |  |  |  |
| Mean (/min.) | 87.61±9.12 | 89.05±9.83 | 0.418 |  | 86.36±10.97 | 89.66±11.70 | **0.031** |
| SDS | 0.31±0.92 | 0.45±0.95 | 0.424 |  | 0.07±1.68 | 0.40±1.22 | **0.039** |
| Variability (%) | 11.54±2.57 | 11.48±4.12 | 0.948 |  | 10.99±2.54 | 12.21±3.24 | 0.222 |
| **Night-time (sleep)** |  |  |  |  |  |  |  |
| Systolic |  |  |  |  |  |  |  |
| Mean (mm Hg) | 95.61±8.86 | 96.61±5.96 | 0.608 |  | 96.77±8.48 | 95.60±5.67 | 0.492 |
| SDS | -0.94±1.29 | -0.81±0.90 | 0.628 |  | -0.71±1.21 | -0.86±0.79 | 0.529 |
| Load (%) | 7.73±19.04 | 4.25±6.96 | 0.449 |  | 2.95±8.53 | 2.44±4.53 | 0.856 |
| Variability (%) | 7.40±1.59 | 7.84±1.71 | 0.463 |  | 6.86±1.25 | 7.87±2.17 | 0.135 |
| >95th pct. n (%) | 1 (5.6) | 0 (0) | 0.331 |  | 0 (0) | 0 (0) | - |
| Diastolic |  |  |  |  |  |  |  |
| Mean (mm Hg) | 59.50±6.83 | 59.05±5.37 | 0.752 |  | 58.34±6.98 | 58.60±7.13 | 0.841 |
| SDS | 0.67±1.10 | 0.62±0.93 | 0.838 |  | 0.54±1.05 | 0.58±1.15 | 0.820 |
| Load (%) | 23.35±26.71 | 19.24±4.01 | 0.487 |  | 19.30±27.05 | 20.73±22.94 | 0.745 |
| Variability (%) | 6.78±2.07 | 7.26±2.08 | 0.536 |  | 6.57±1.17 | 6.78±1.97 | 0.746 |
| >95th pct. n (%) | 3 (16.7) | 3 (16.7) | 1.000 |  | 2 (13.3) | 3 (20.0) | 0.334 |
| MAP |  |  |  |  |  |  |  |
| Mean (mm Hg) | 71.61±7.09 | 71.83±5.22 | 0.876 |  | 72.46±5.83 | 72.33±5.25 | 0.961 |
| SDS | 0.11±1.20 | 0.11±0.84 | 0.989 |  | 0.26±0.95 | 0.24±0.79 | 0.901 |
| Load (%) | - | - | - |  | - | - | - |
| Variability (%) | 6.29±1.75 | 6.83±1.78 | 0.422 |  | 5.79±1.30 | 6.52±2.15 | 0.223 |
| >95th pct. n (%) | 2 (11.1) | 1 (5.6) | 0.579 |  | 1 (6.7) | 0 (0) | 0.334 |
| Pulse pressure |  |  |  |  |  |  |  |
| Mean (mm Hg) | 36.27±4.52 | 37.33±4.72 | 0.402 |  | 38.42±7.67 | 36.93±5.53 | 0.305 |
| Variability (%) | 5.80±1.34 | 5.42±1.33 | 0.347 |  | 5.70±1.82 | 5.41±1.80 | 0.580 |
| Heart rate |  |  |  |  |  |  |  |
| Mean (/min.) | 69.83±9.88 | 74.61±10.01 | **0.002** |  | 68.59±8.64 | 71.40±9.15 | 0.194 |
| SDS | 0.26±1.00 | 0.76±0.94 | **0.002** |  | 0.07±0.77 | 0.35±1.08 | 0.275 |
| Variability (%) | 7.06±3.41 | 8.25±2.89 | 0.247 |  | 9.07±4.87 | 9.82±3.74 | 0.665 |

Results are presented as mean ± standard deviation

PMS: premenstrual syndrome; SDS: standard deviation score, MAP: mean arterial pressure
